# Supplementary material for: Assessment of inter-city transport of particulate matter in the Beijing–Tianjin–Hebei region
Source: Copernicus journal article supplement (doi:10.5194/acp-18-4843-2018), 2018-04-10
Supplement: Supplementary file 1 [file acp-18-4843-2018-supplement.pdf]

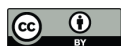

*Supplement of*

## **Assessment of inter-city transport of particulate matter in the Beijing–Tianjin–Hebei region**

**Xing Chang et al.**

*Correspondence to:* Shuxiao Wang (shxwang@tsinghua.edu.cn) and Bin Zhao (zhaob1206@ucla.edu)

The copyright of individual parts of the supplement might differ from the CC BY 4.0 License.

## 1 **1. Spatial distribution of emission**

2 Figure S1 shows the spatial distribution of three main pollutants, i.e. PM<sub>2.5</sub>,  
3 NO<sub>x</sub> and SO<sub>2</sub>, in the BTH region. The emissions are allocated into grids  
4 with GDP, population or road patterns, based on different emission sectors.

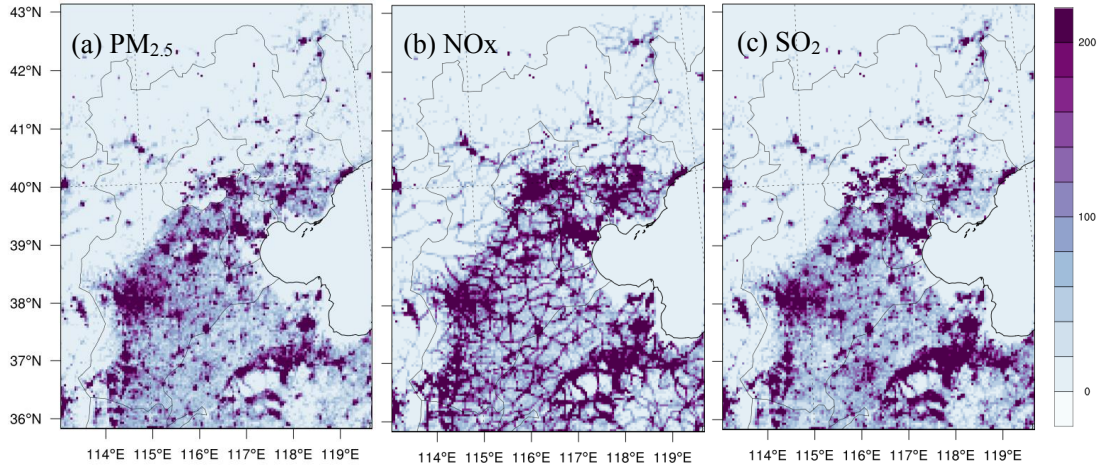

5  
6 **Figure S1 Spatial distribution of the emission of (a) PM<sub>2.5</sub>, (b) NO<sub>x</sub> and (c) SO<sub>2</sub> in**  
7 **the 4-km grid covering the BTH region. Units are all in t year<sup>-1</sup> grid<sup>-1</sup>**

8

## 9 **2. Evaluation of the meteorology simulation**

10 The simulated meteorological fields are evaluated by the observation data  
11 in the BTH region. The observational data of meteorology are from the  
12 National Climatic Data Center (NCDC) of NOAA ([www.ncdc.noaa.gov](http://www.ncdc.noaa.gov)),  
13 where observations of every 3 hours in 78 international exchange sites in  
14 the BTH region are provided. The statistical indices used for evaluation  
15 include the bias and gross error (GE) between observation and simulation  
16 with regard to wind speed at 10 m, temperature at 2 m, and specific  
17 humidity at 2 m. The bias and GE are defined as

$$\text{bias} = \frac{\sum_1^n (\text{SIM} - \text{OBS})}{n} \quad (1)$$

$$\text{GE} = \frac{\sum_1^n |\text{SIM} - \text{OBS}|}{n} \quad (2)$$

where  $n$  is the total number of observation and simulation data pairs, and SIM and OBS stand for individual simulated and observed values respectively. The parameters evaluated include wind speed at 10 m (WS10), wind direction at 10 m (WD10), temperature at 2 m (T2), and specific humidity at 2 m (Q2). The results are shown in Table S1. The WS10, T2, and Q2 simulations all agree well with observations under the benchmark suggested by Emery (2011). The bias of WD10 also falls within the benchmark, but the gross error exceeds the benchmark for both January and July. The larger gross error is partly caused by the lower precision of the observation data. The WD10 observations only have 16 different values, while the simulation could have any value between 0 and 360. For example, if the real WD10 is 125 degree, the value will be reported as 140 degree. Even if the simulation is exactly 125 degree, an additional gross error of 15 degree will be introduced. In addition, compared to other similar simulation studies in China (e.g., Hu et al., 2016; Zhao et al., 2013), the gross error of WD10 falls in a similar range.

37 **Table S1 Comparison of simulated and observed meteorology parameters.**

| Parameter                | Indice           | Unit               | Benchmark <sup>a</sup> | Jan-2012 | Jul-2012 |
|--------------------------|------------------|--------------------|------------------------|----------|----------|
| Wind speed<br>(WS10)     | Observation Mean | m s <sup>-1</sup>  | -                      | 2.34     | 2.32     |
|                          | Simulation Mean  | m s <sup>-1</sup>  | -                      | 2.59     | 2.51     |
|                          | Bias             | m s <sup>-1</sup>  | ≤±0.5                  | -0.24    | -0.20    |
|                          | Gross error      | m s <sup>-1</sup>  | ≤2                     | 1.12     | 1.08     |
| Wind direction<br>(WD10) | Observation Mean | deg                | -                      | 203.9    | 175.2    |
|                          | Simulation Mean  | deg                | -                      | 222.4    | 174.8    |
|                          | Bias             | deg                | ≤±10                   | -2.64    | -1.47    |
|                          | Gross error      | deg                | ≤30                    | 43.23    | 43.7     |
| Temperature<br>(T2)      | Observation Mean | K                  | -                      | 266.1    | 298.0    |
|                          | Simulation Mean  | K                  | -                      | 266.2    | 297.8    |
|                          | Bias             | K                  | ≤±0.5                  | -0.13    | 0.22     |
|                          | Gross error      | K                  | ≤2                     | 1.64     | 1.72     |
| Humidity (Q2)            | Observation Mean | g kg <sup>-1</sup> | -                      | 1.23     | 14.80    |
|                          | Simulation Mean  | g kg <sup>-1</sup> | -                      | 1.36     | 14.56    |
|                          | Bias             | g kg <sup>-1</sup> | ≤±1                    | -0.13    | 0.23     |
|                          | Gross error      | g kg <sup>-1</sup> | ≤2                     | 0.29     | 1.53     |

38 a. The benchmarks used in this study are suggested by Emery (2011)

39

### 40 **3. Comparison of the simulation and observation results for** 41 **the major components of PM<sub>2.5</sub>**

42 The simulation results of the major components of PM<sub>2.5</sub> are compared

with observations in Ling County and Xiong County from Jul. 22<sup>nd</sup> to Aug. 23<sup>rd</sup>. The results are shown in Figure S1. Some statistical indices including NMB and NME are calculated, as is shown in Table S2.

**Table S2 Comparison of simulated and observed PM<sub>2.5</sub> and its major components in two sites from Jul, 22<sup>nd</sup> to Aug. 23<sup>rd</sup>, 2013.**

| Jul 22 ~ Aug 23, 2013   |                         | Observation<br>Mean | Simulation<br>Mean | NMB   | NME   |
|-------------------------|-------------------------|---------------------|--------------------|-------|-------|
| Unit                    |                         | μg·m <sup>-3</sup>  | μg·m <sup>-3</sup> | %     | %     |
| <b>Xiong<br/>County</b> | Total PM <sub>2.5</sub> | 75.5                | 84.5               | +11.9 | 36.9  |
|                         | EC                      | 2.76                | 6.07               | +120  | 123.3 |
|                         | OC                      | 10.88               | 8.12               | -25.4 | 33.0  |
|                         | Nitrate                 | 11.6                | 22.7               | +95.2 | 114.0 |
|                         | Sulfate                 | 20.7                | 9.87               | -52.3 | 55.5  |
|                         | Ammonium                | 10.1                | 10.3               | +2.4  | 38.6  |
| <b>Ling<br/>County</b>  | Total PM <sub>2.5</sub> | 73.9                | 64.5               | -7.5  | 37.4  |
|                         | EC                      | 1.70                | 3.43               | +117  | 132.3 |
|                         | OC                      | 6.09                | 5.76               | -1.2  | 32.4  |
|                         | Nitrate                 | 12.3                | 21.4               | +78.6 | 92.1  |
|                         | Sulfate                 | 24.6                | 10.0               | -56.6 | 58.6  |
|                         | Ammonium                | 12.3                | 9.99               | -14.2 | 40.8  |

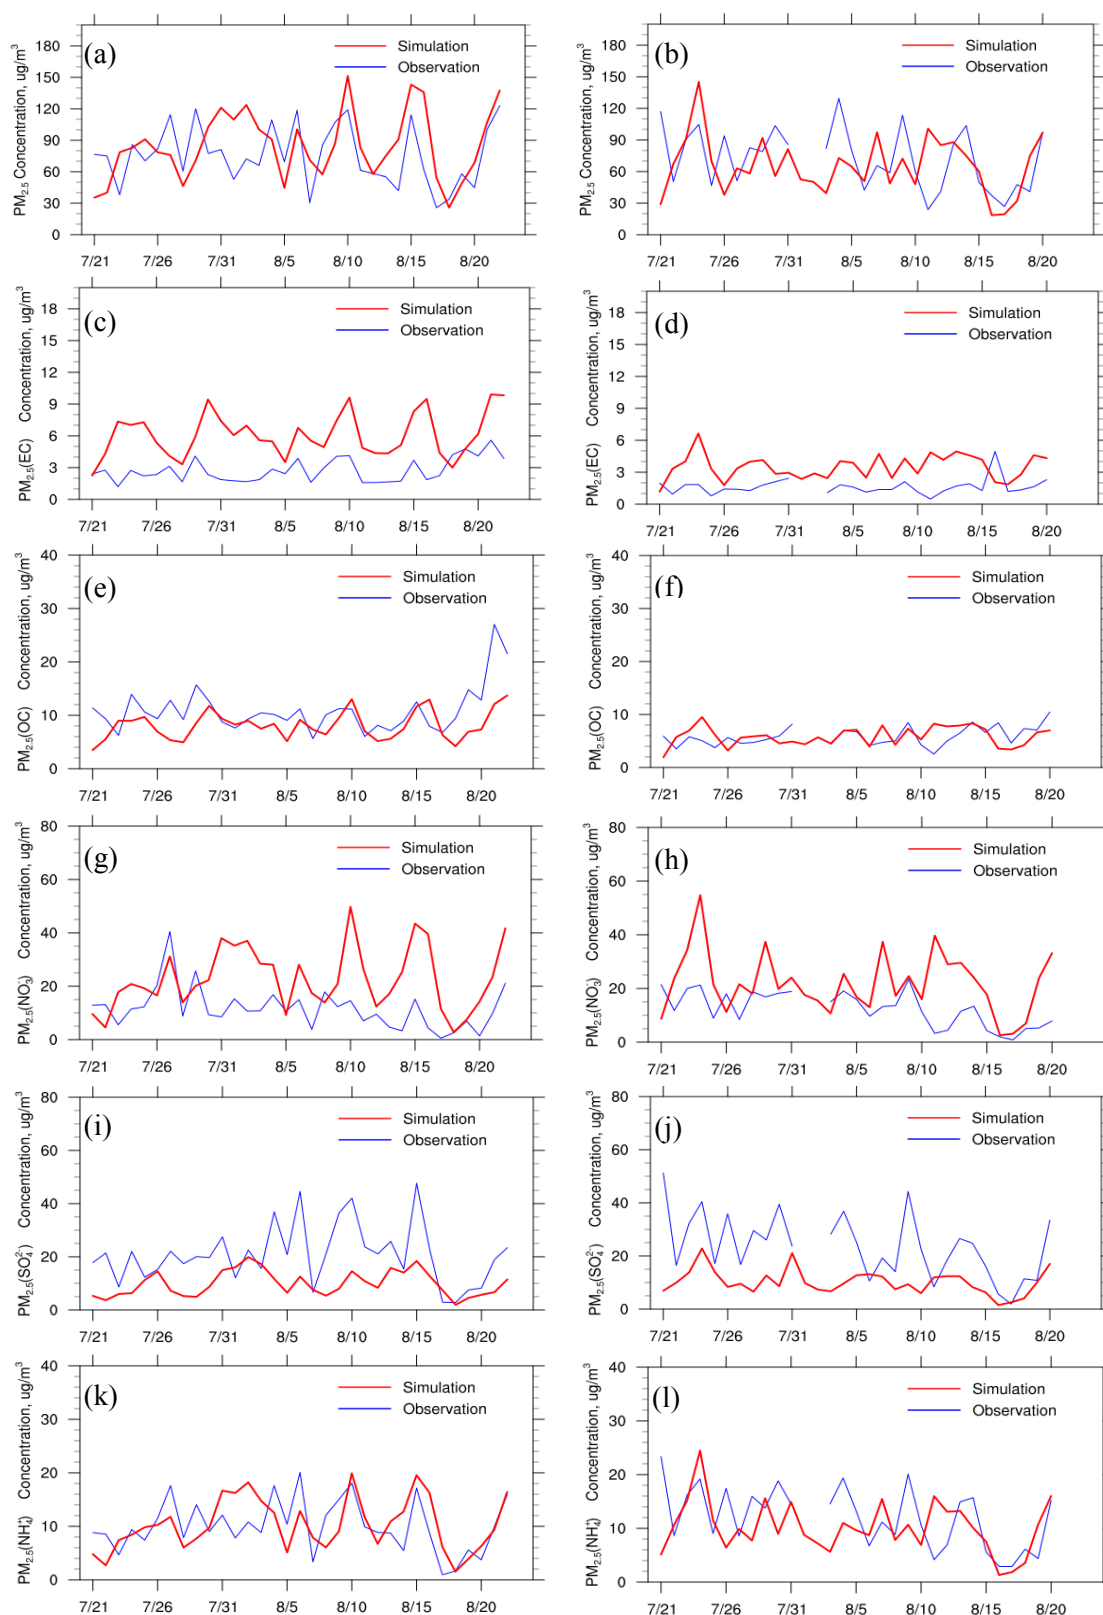

**Figure S2 Time series of the simulation and observation of (a, b) PM<sub>2.5</sub>, and its five major components: (c, d) EC, (e, f) OC, (g, h) nitrate, (i, j) sulfate and (k, l) ammonium in Xiong County (left) and Ling County (right) during Jul. 22<sup>nd</sup> to Aug. 23<sup>rd</sup>, 2013.**

53

54 The model performance on the PM<sub>2.5</sub> major components are compared with  
55 other studies in the BTH region, shown in Table S3. All of the studies  
56 underestimate the sulfate concentrations. The underestimation ranges  
57 between 9% and 79%, and most of them are larger than 30%. The nitrate  
58 simulation results vary in different studies, but the majority of the studies  
59 tend to overestimate its concentration. The concentration of EC is usually  
60 much lower than the other four components, which may contribute to the  
61 large discrepancy in the simulation results in different studies. For OC,  
62 although some studies overestimate the concentration, more studies exhibit  
63 a lower concentration than observation. Generally speaking, the biases of  
64 the PM<sub>2.5</sub> components in the current study have similar magnitude to other  
65 recent studies in the BTH region.

66

67 **Table S3 Summary of the PM<sub>2.5</sub> component simulation results for the BTH region**  
68 **in recent studies**

| Time                  | Site                       | SO <sub>4</sub> <sup>2-</sup> | NO <sub>3</sub> <sup>-</sup> | NH <sub>4</sub> <sup>+</sup> | EC  | OC  | Reference         |
|-----------------------|----------------------------|-------------------------------|------------------------------|------------------------------|-----|-----|-------------------|
|                       |                            | NMB                           | NMB                          | NMB                          | NMB | NMB |                   |
|                       |                            | (%)                           | (%)                          | (%)                          | (%) | (%) |                   |
| 2005 annual           | Tsinghua, Beijing          | -14                           | 13                           | 10                           | -24 | -36 | Wang et al., 2011 |
| 2005 annual           | Miyun, Beijing             | -36                           | 62                           | 9                            | -17 | -52 | Wang et al., 2011 |
| 14 Jan – 8 Feb, 2010  | Beijing                    | -72                           | -32                          | -5                           | 124 | 26  | Liu et al., 2016  |
| 14 Jan – 8 Feb, 2010  | Shangdianzi, Beijing       | -78                           | -24                          | -13                          | 36  | -7  | Liu et al., 2016  |
| Jan, 2010             | Peking university, Beijing | -39                           | 85                           | 33                           | 101 | -2  | Liu et al., 2016  |
| 14 Jan – 8 Feb, 2010  | Shijiazhuang, Hebei        | -79                           | -35                          | -7                           | 81  | 38  | Liu et al., 2016  |
| 14 Jan – 8 Feb, 2010  | Chengde, Hebei             | -78                           | 48                           | -10                          | -39 | -50 | Liu et al., 2016  |
| 14 Jan – 8 Feb, 2010  | Tianjin                    | -72                           | 0                            | 9                            | 149 | 85  | Liu et al., 2016  |
| 11-15 Jan, 2013       | Beijing                    | ~ -73                         | ~ -43                        | -                            | -   | -   | Wang et al., 2014 |
| Jan 2013              | Handan, Hebei              | -9                            | 33                           | -11                          | 50  | 37  | Wang et al., 2015 |
| Jul 2013              | Handan, Hebei              | -32                           | -3                           | 8                            | 96  | 30  | Wang et al., 2015 |
| Oct – Nov, 2014       | 7 sites in the BTH region  | -48                           | 16                           | -25                          | 87  | -37 | Zhao et al., 2017 |
| 22 Jul – 23 Aug, 2012 | Xiong County, Hebei        | -52                           | 95                           | 2                            | 120 | -25 | This study        |
| 22 Jul – 23 Aug, 2012 | Ling County, Shandong      | -57                           | 79                           | -14                          | 117 | -1  | This study        |

69



## 70 4. Wind rose plots for Tianjin and Shijiazhuang

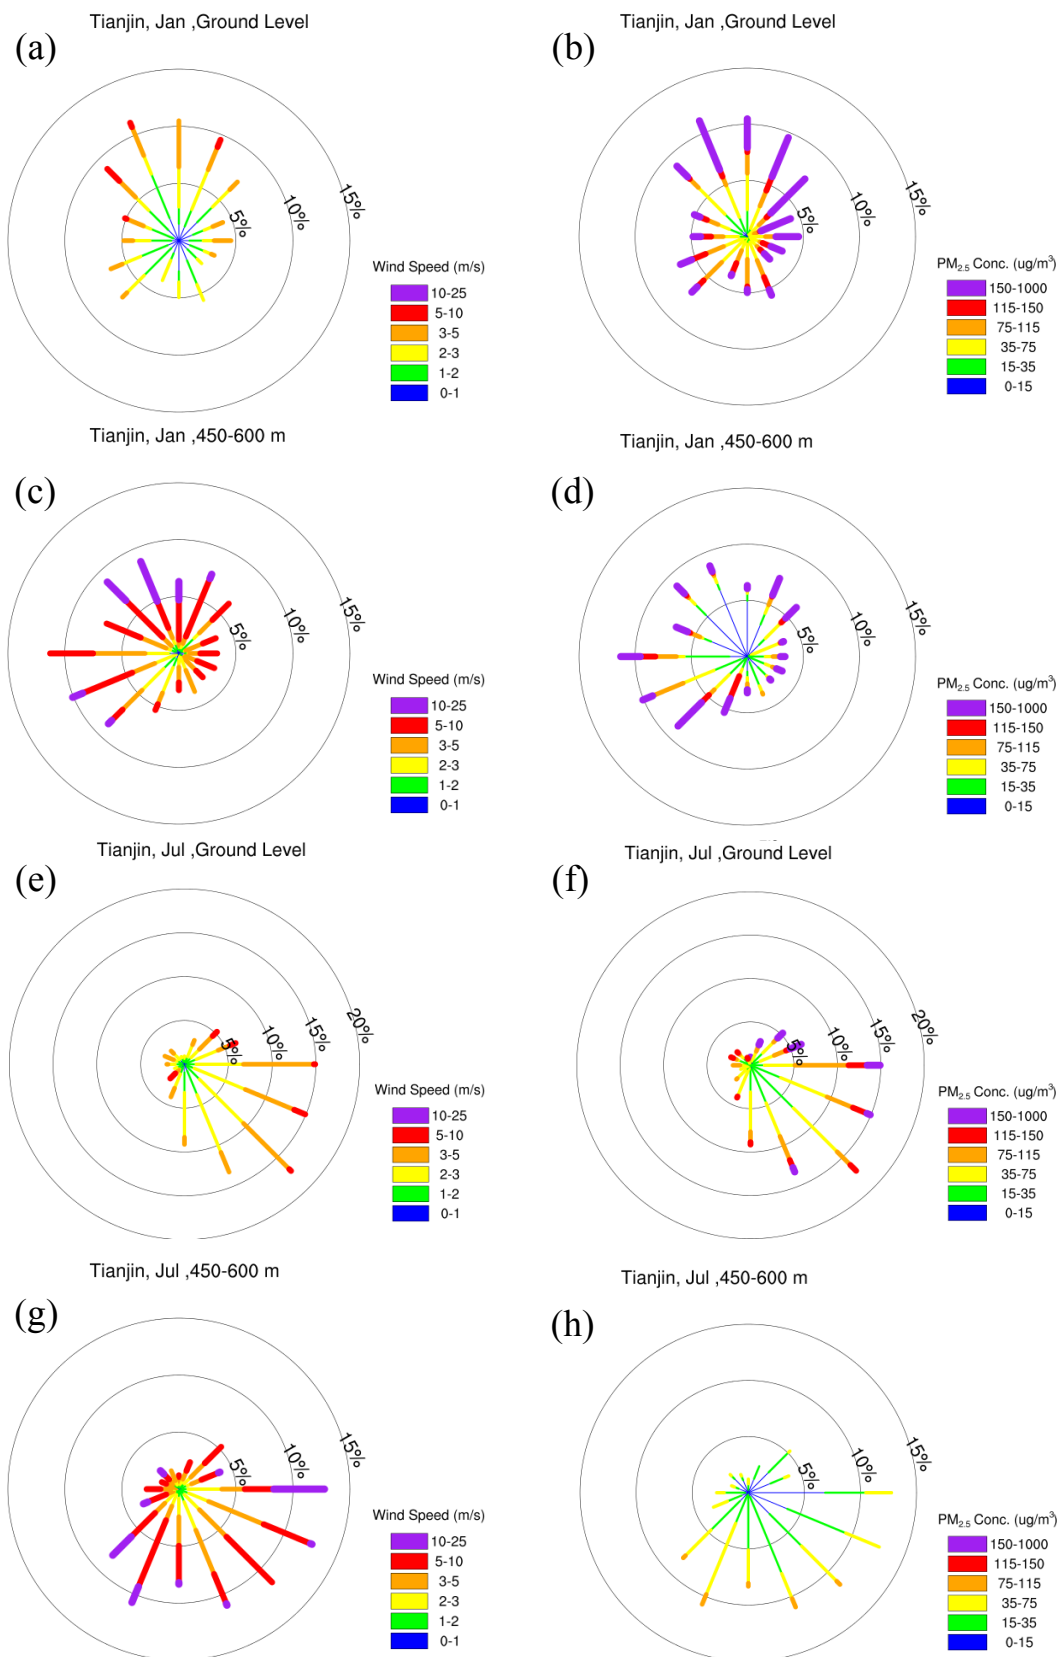

71  
72 **Figure S3 The wind rose plots showing the frequency of wind speed (a, c, e, g) and**

73 **PM<sub>2.5</sub> concentration (b, d, f, h) at different wind directions for Tianjin. The round**  
74 **level and the 7th level (about 450-600 m) in the model are chosen as the**  
75 **representation of lower levels and upper levels. The percentages denote the**  
76 **frequency.**  
77

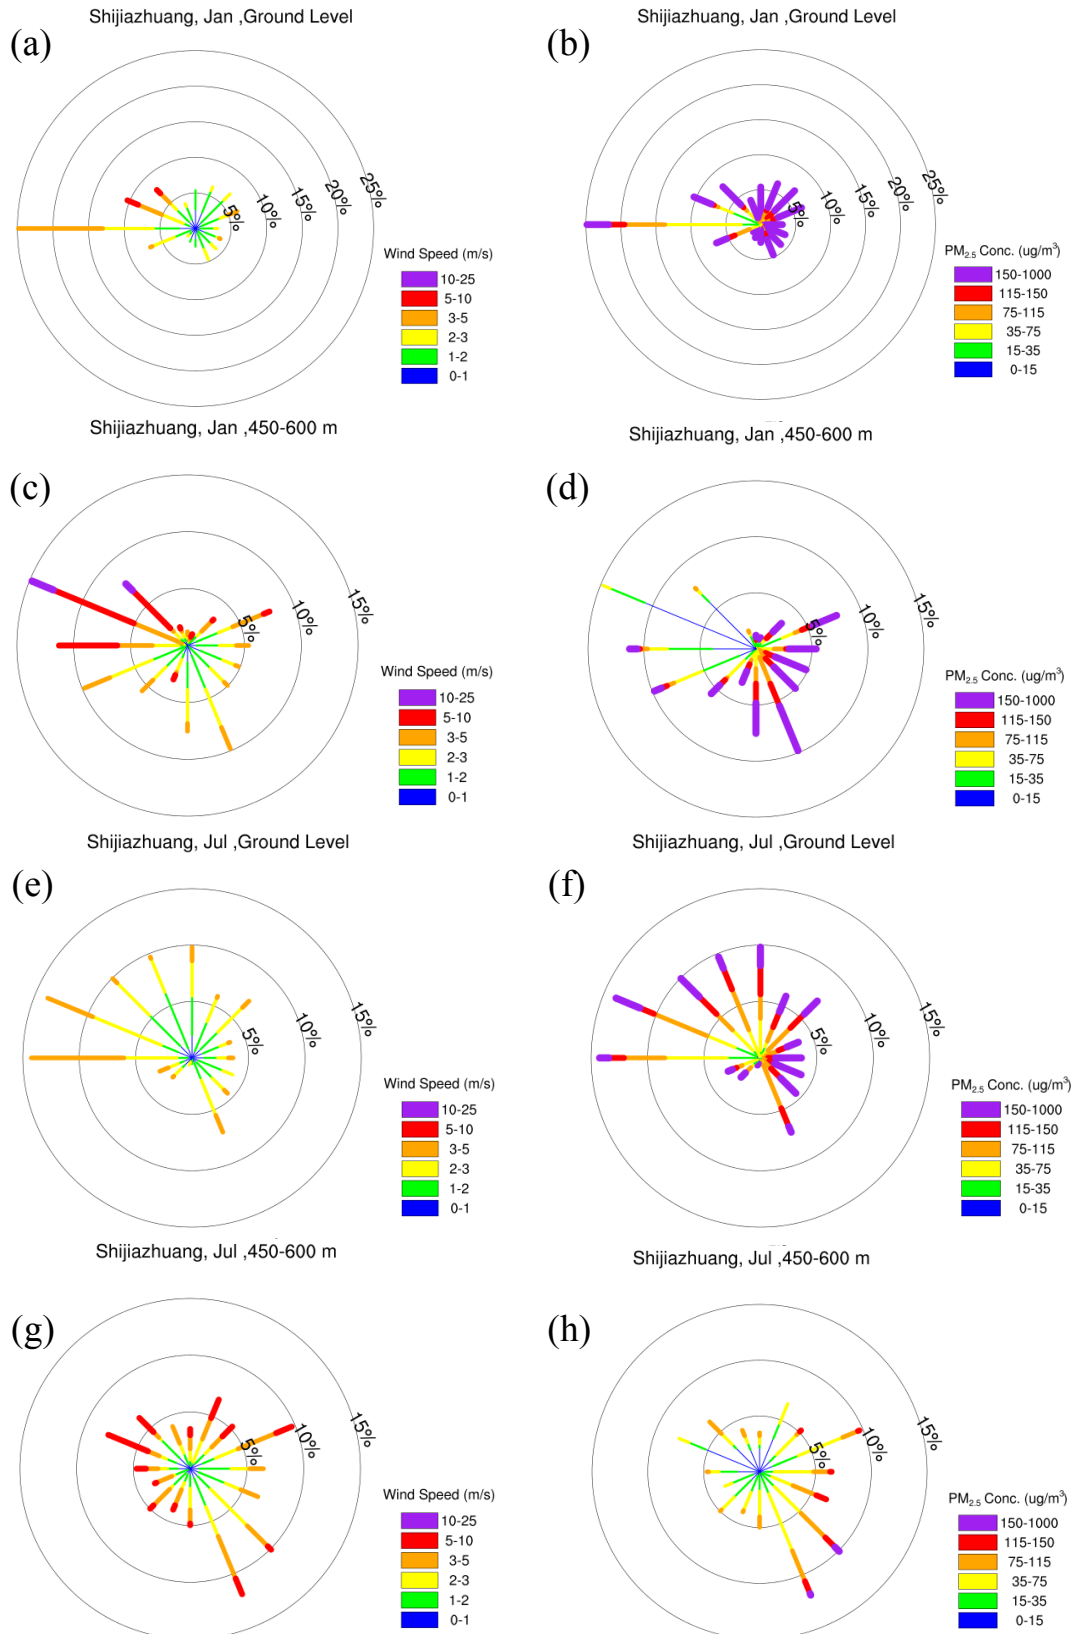

**Figure S4 The wind rose plots showing the frequency of wind speed (a, c, e, g) and  $PM_{2.5}$  concentration (b, d, f, h) at different wind directions for Shijiazhuang. The round level and the 7th level (about 450-600 m) in the model are chosen as the**

representation of lower levels and upper levels. The percentages denote the frequency.

## **5. The influence of mountain-plain winds on the transport in Beijing**

The simulated average diurnal wind patterns at 100 m height in January and July in Beijing are shown in Fig. S5(b). We also put the observation results from Tang et al., (2016) in Fig S5(a) as a reference. We find that the simulated wind pattern is consistent with the observation. In January, the mountain-plain winds are presented as the change in wind speed, but the wind direction does not change significantly during the whole day. In July, there is a significant wind direction shift, similar to the description of the reviewer. The mountainous wind (northeast) begins at 2:00 LT, and is taken over by the plain wind (southeast) at about 10:00 LT, and the mountainous wind is much weaker than the plain wind. A circulation of mountain-plain wind may have influence on the transport of  $PM_{2.5}$  in July.

Considering that the mountain-plain wind circulation mainly happens at the foot of the mountains, we calculated the fluxes through the boundaries between Beijing and its three neighboring cities on the south/southeast (Baoding, Langfang and Tianjin) during mountainous wind hours and the plain wind hours in July separately (Fig. S6). During the plain wind hours, all the boundaries on the southwest and southeast of Beijing have positive net fluxes, which is due to the relatively strong southerly plain winds. During the mountainous wind hours, however, there is no significant

106 direction change of the fluxes except for the boundary of Baoding and  
107 Southern Langfang at levels below 200 m. The sign of fluxes mostly  
108 remains unchanged because the mountain-plain wind circulation is  
109 weaker at higher levels, and the wind speed of the mountainous wind is  
110 even weaker at the southernly boundaries which has limited effect to alter  
111 the sign of the flux. Nevertheless, the magnitude of fluxes is significantly  
112 smaller than the plain wind hours, which is partly attributed to the  
113 mountain-plain wind circulation. Therefore, the summertime mountain-  
114 plain wind circulation in Beijing does not significantly alter the sign of  
115 inter-city  $PM_{2.5}$  fluxes but does have considerable impact on their  
116 magnitude.  
117

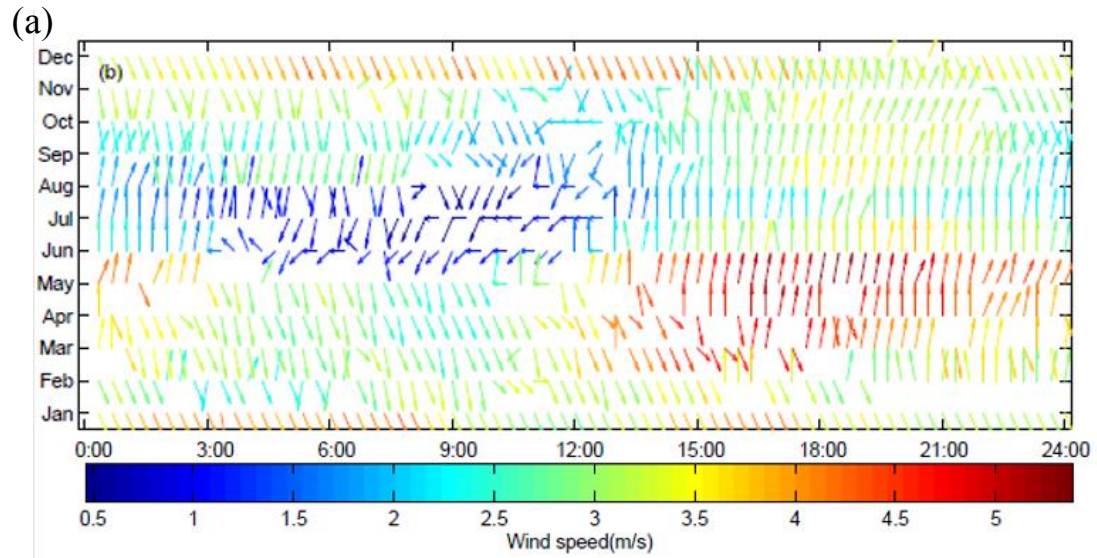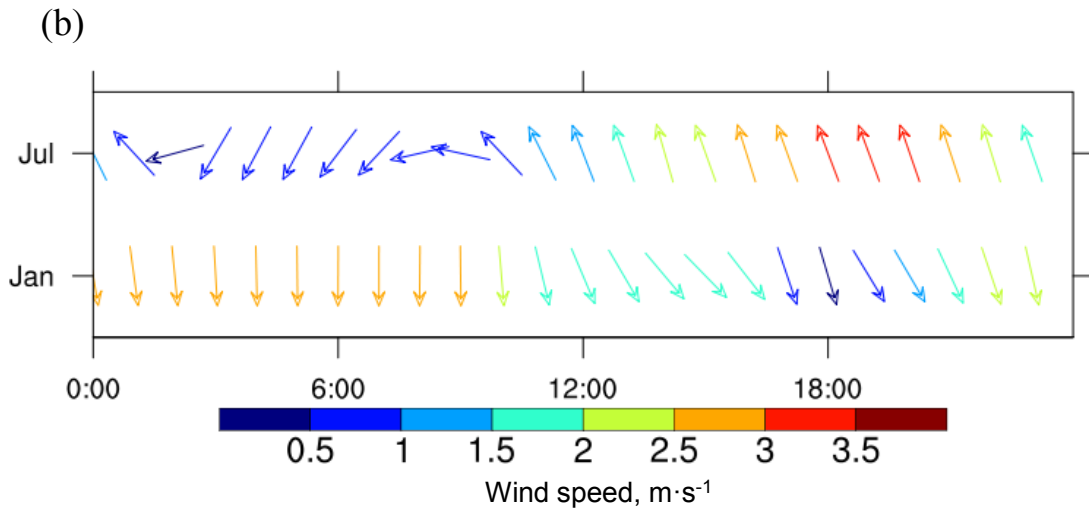

**Figure S5 The observed and simulated monthly average diurnal variation of winds in Beijing in July. (a) The observation results from Tang et al. (2016). (b) The simulation results in this study.**

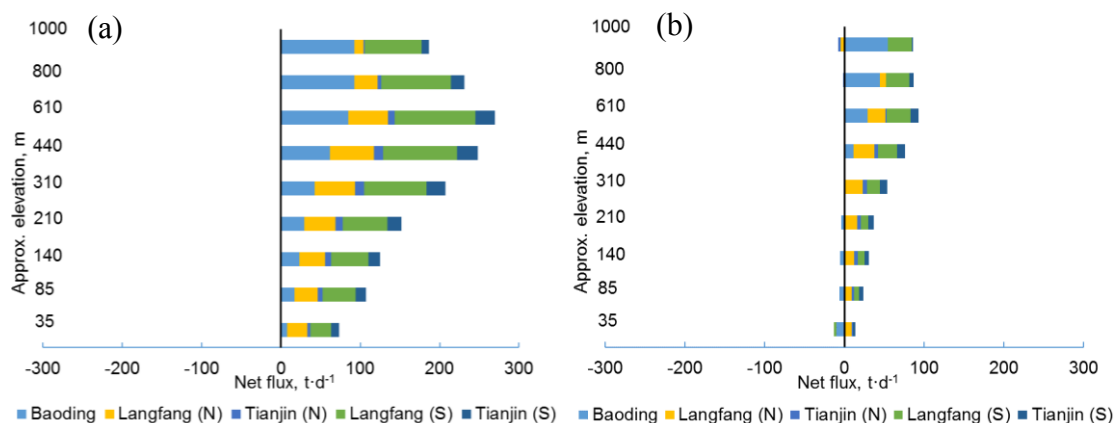

**Figure S6 The transport fluxes in July between Beijing and its neighboring cities during (a) plain wind hours (11:00 – 1:00 (+1 day) LT) and (b) mountainous wind hours (2:00 – 10:00 LT)**

## References

- Emery, C., Tai, E., and Yarwood, G.: Enhanced meteorological modeling and performance evaluation for two texas episodes, Prepared for the Texas Natural Resource Conservation Commission, by ENVIRON International Corp, Novato, CA, 2001.
- Hu, J., Chen, J., Ying, Q., and Zhang, H.: One-year simulation of ozone and particulate matter in China using WRF/CMAQ modeling system, *Atmospheric Chemistry and Physics*, 16, 10333-10350, 10.5194/acp-16-10333-2016, 2016.
- Kwok, R. H. F., Baker, K. R., Napelenok, S. L., and Tonnesen, G. S.: Photochemical grid model implementation and application of VOC, NO<sub>x</sub>, and O<sub>3</sub> source apportionment, *Geoscientific Model Development*, 8, 99-114, 10.5194/gmd-8-99-2015, 2015.
- Liu, J., Mauzerall, D. L., Chen, Q., Zhang, Q., Song, Y., Peng, W., Klimont,

143 Z., Qiu, X. H., Zhang, S. Q., Hu, M., Lin, W. L., Smith, K. R., and  
 144 Zhu, T.: Air pollutant emissions from Chinese households: A major  
 145 and underappreciated ambient pollution source, *P. Natl. Acad. Sci.*  
 146 *USA*, 113, 7756–7761, 2016.

147 Tang, G., Zhang, J., Zhu, X., Song, T., Muenkel, C., Hu, B., Schaefer, K.,  
 148 Liu, Z., Zhang, J., Wang, L., Xin, J., Suppan, P., and Wang, Y.: Mixing  
 149 layer height and its implications for air pollution over Beijing, China,  
 150 *Atmospheric Chemistry and Physics*, 16, 2459-2475, 10.5194/acp-16-  
 151 2459-2016, 2016.

152 Wang, S., Xing, J., Chatani, S., Hao, J., Klimont, Z., Cofala, J., and Amann,  
 153 M.: Verification of anthropogenic emissions of China by satellite and  
 154 ground observations, *Atmospheric Environment*, 45, 6347-6358,  
 155 10.1016/j.atmosenv.2011.08.054, 2011.

156 Wang, L. T., Wei, Z., Yang, J., Zhang, Y., Zhang, F. F., Su, J., Meng, C. C.,  
 157 and Zhang, Q.: The 2013 severe haze over southern Hebei, China:  
 158 model evaluation, source apportionment, and policy implications,  
 159 *Atmospheric Chemistry and Physics*, 14, 3151-3173, 10.5194/acp-14-  
 160 3151-2014, 2014.

161 Wang, L., Wei, Z., Wei, W., Fu, J. S., Meng, C., and Ma, S.: Source  
 162 apportionment of PM<sub>2.5</sub> in top polluted cities in Hebei, China using  
 163 the CMAQ model, *Atmospheric Environment*, 122, 723-736,  
 164 10.1016/j.atmosenv.2015.10.041, 2015.

165 Zhao, B., Wang, S., Wang, J., Fu, J. S., Liu, T., Xu, J., Fu, X., and Hao, J.:  
 166 Impact of national NO<sub>x</sub> and SO<sub>2</sub> control policies on particulate matter



167 pollution in China, *Atmospheric Environment*, 77, 453-463,  
168 10.1016/j.atmosenv.2013.05.012, 2013.

169 Zhao, B., Wu, W., Wang, S., Xing, J., Chang, X., Liou, K.-N., Jiang, J. H.,  
170 Jang, C., Fu, J. S., Zhu, Y., Wang, J., and Hao, J.: A modeling study of  
171 the nonlinear response of fine particles to air pollutant emissions in  
172 the Beijing-Tianjin-Hebei region, *Atmospheric Chemistry and*  
173 *Physics Discussions*, 10.5194/acp-2017-428, 2017.

174
